# Supplementary material for: Ocean acidification increases susceptibility to sub-zero air temperatures in ecosystem engineers and limits poleward range shifts
Source: eLife journal article supplement (doi:10.7554/elife.81080), 2023-04-11
Supplement: supp [file elife-81080-supp-v1.zip]

Archive with 8 entries (8 files):
- elife_poa_e81080_Figure_1_figure_supplement_1.jpg
- elife_poa_e81080_Supplementary_file_1.docx
- elife_poa_e81080_Supplementary_file_2.docx
- elife_poa_e81080_Supplementary_file_3.docx
- elife_poa_e81080_Supplementary_file_4.docx
- elife_poa_e81080_Supplementary_file_5.docx
- elife_poa_e81080_Supplementary_file_6.docx
- elife_poa_e81080_Transparent_Reporting_File.pdf
