# Supplementary figures and images for: Ocean acidification increases susceptibility to sub-zero air temperatures in ecosystem engineers and limits poleward range shifts
Source: eLife journal article supplement (doi:10.7554/elife.81080), 2023-04-11

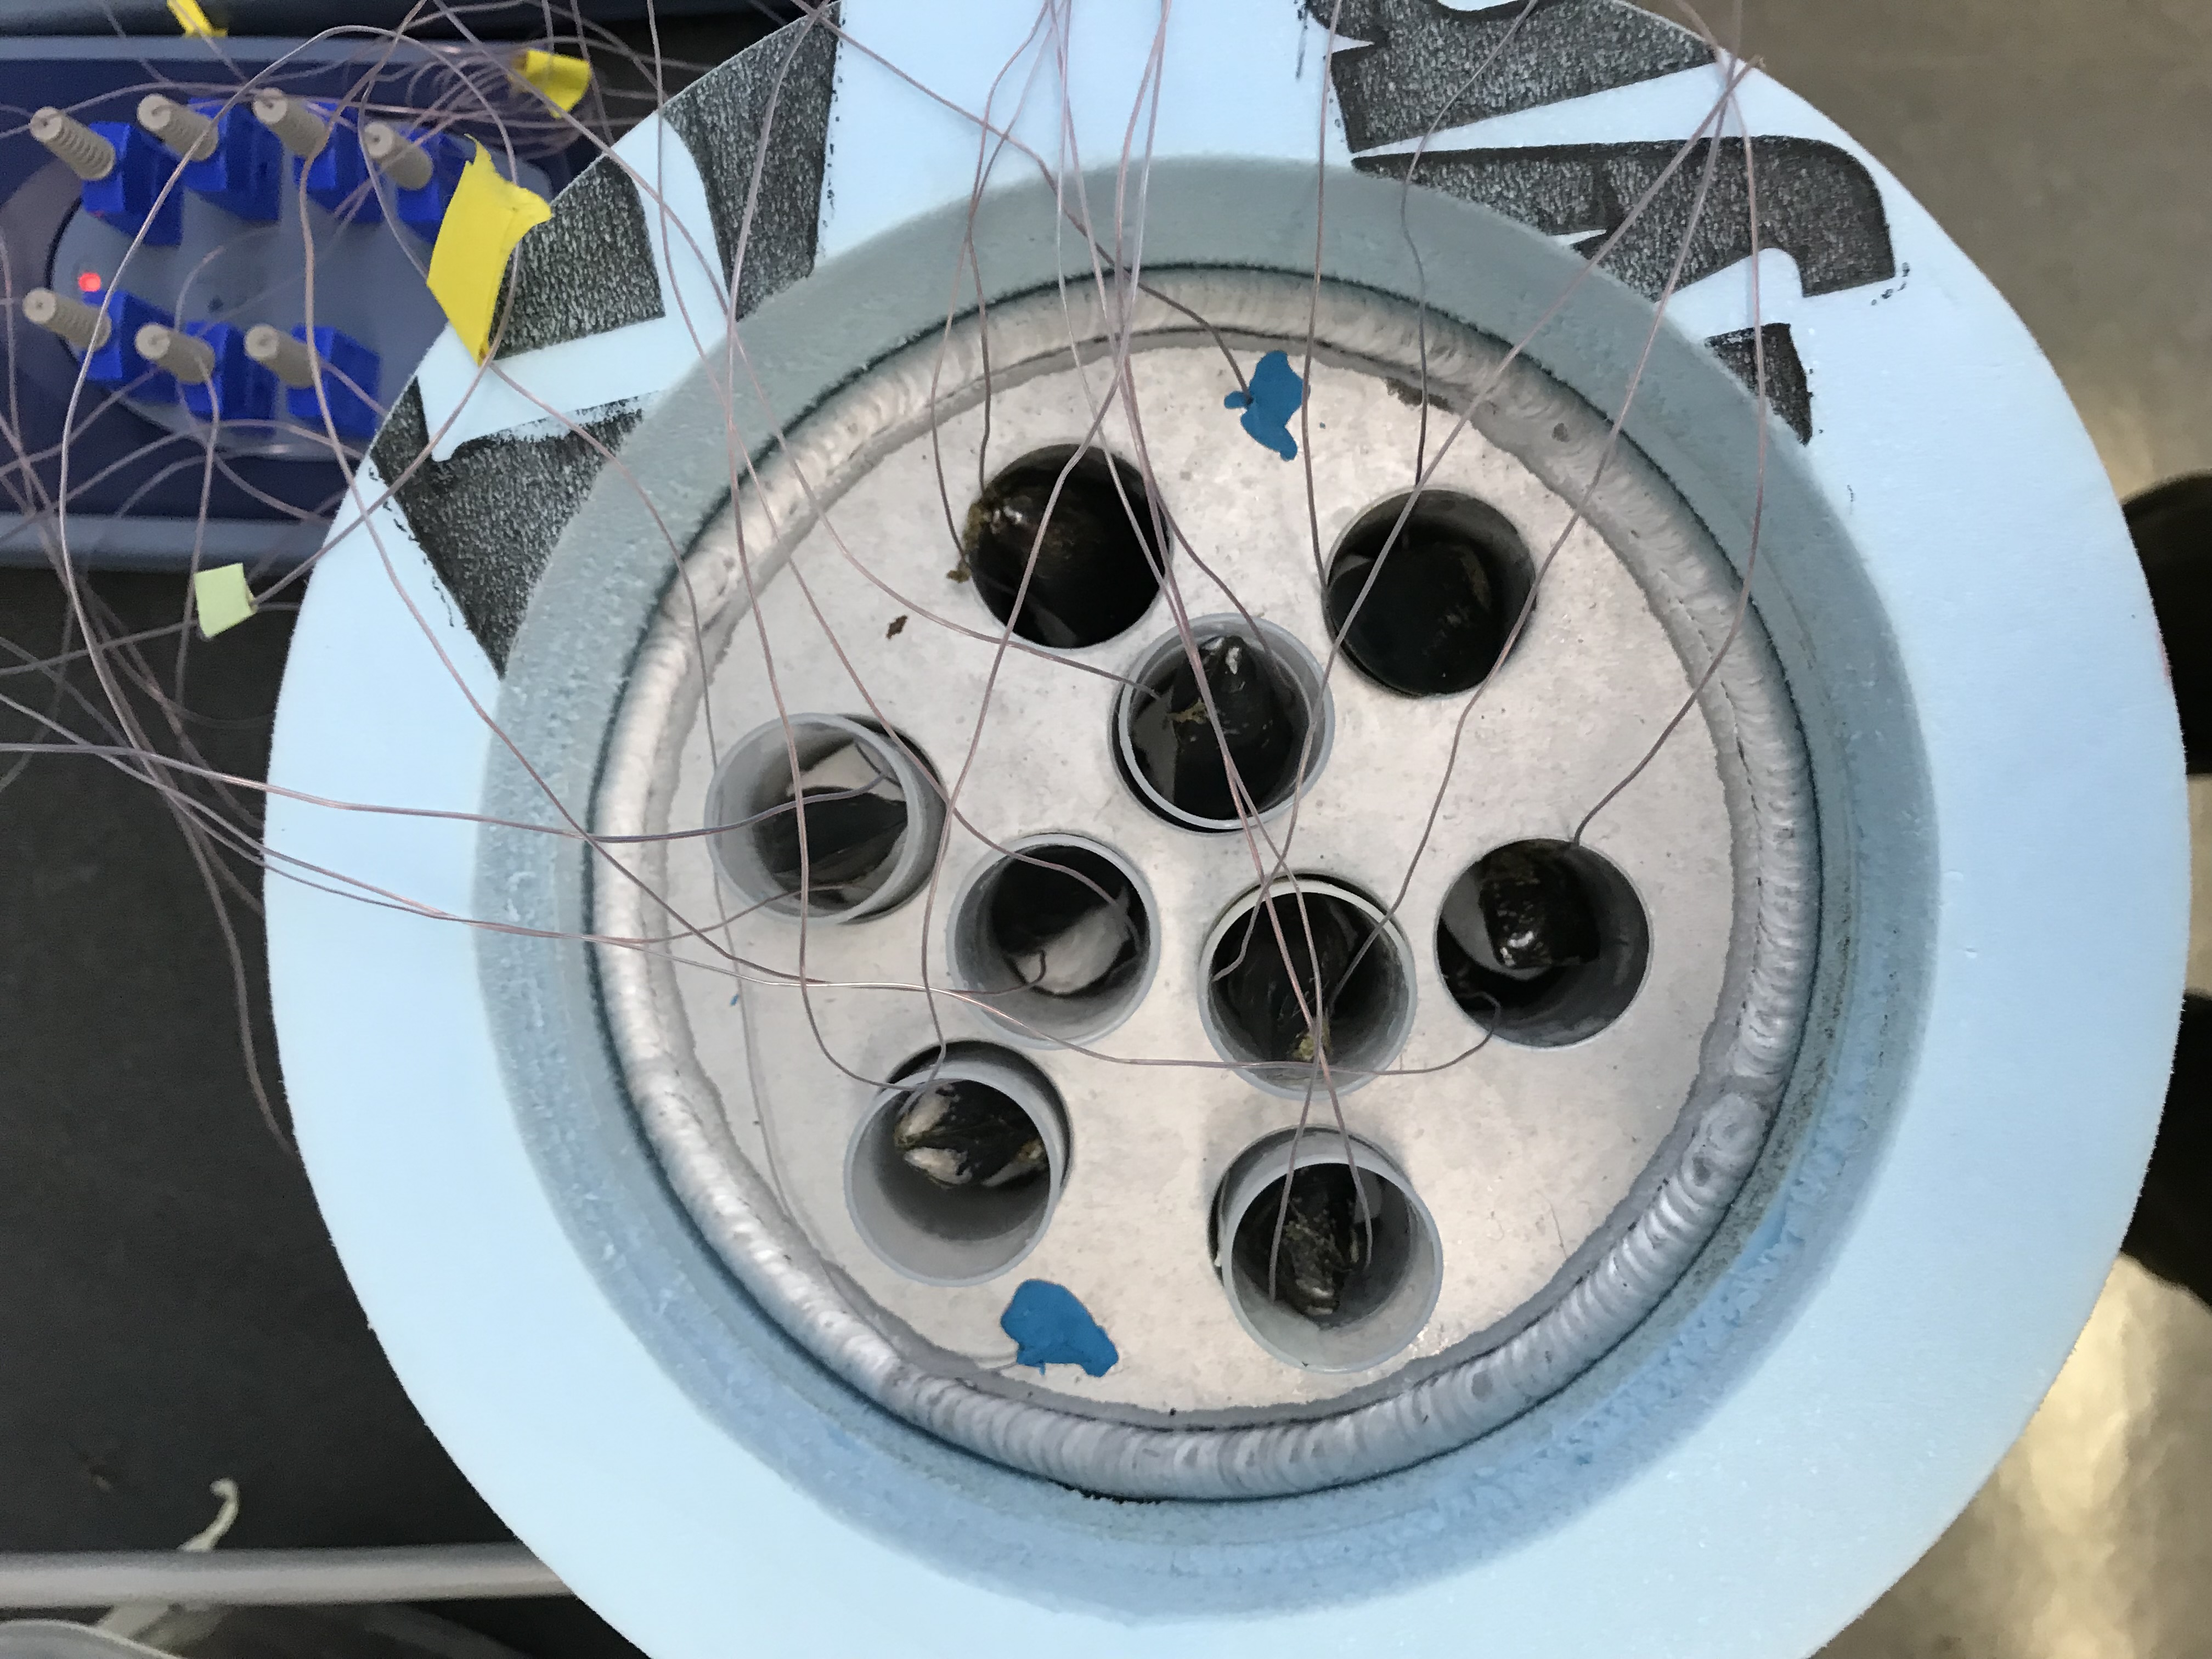

Supplement: supp [file elife-81080-supp-v1.zip › elife_poa_e81080_Figure_1_figure_supplement_1.jpg]
